# Supplementary material
Source: MDPI journal article supplement (https://www.mdpi.com/2072-4292/10/11/1704)
Supplement: s1 [file s1]

## Supplementary Material: Two-Step Urban Water Index (TSUWI): A New Technique for High-resolution Mapping of Urban Surface Water

**Table S1.** List of water indexes. B, G, R and NIR refer to the surface reflectance of the green, red, blue and near infrared bands. SWIR1 and SWIR2 donate the surface reflectance of two shortwave infrared bands (band 5 and band7) in the Landsat TM/ETM+ imagery.

| Index | Source                    | Equation                                                                                                                            |
|-------|---------------------------|-------------------------------------------------------------------------------------------------------------------------------------|
| NDWI  | Mcfeters (1996) [23]      | $\frac{G - NIR}{G + NIR}$                                                                                                           |
| MNDWI | Xu (2006) [24]            | $\frac{G - SWIR1}{G + SWIR1}$                                                                                                       |
| AWEI  | Feyisa et al. (2014) [22] | $4 \times (G - SWIR1) - (0.25 \times NIR + 2.75 \times SWIR1)$<br>$B + 2.5 \times G - 1.5 \times (NIR + SWIR1) - 0.25 \times SWIR2$ |
| HRWI  | Yao et al. (2015) [29]    | $6 \times G - R - 6.5 \times NIR + 0.2$                                                                                             |

TSUWI

NDWI

HRWI

SVM

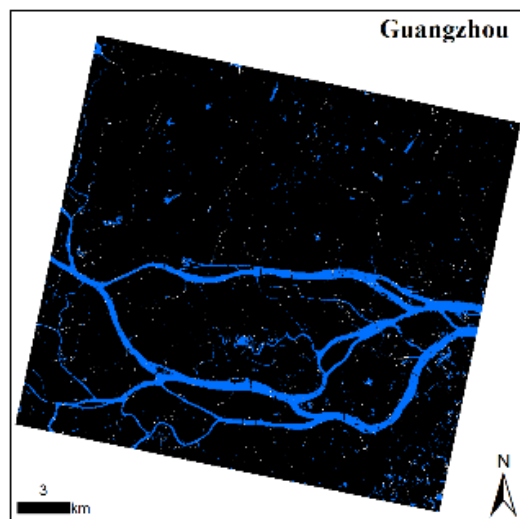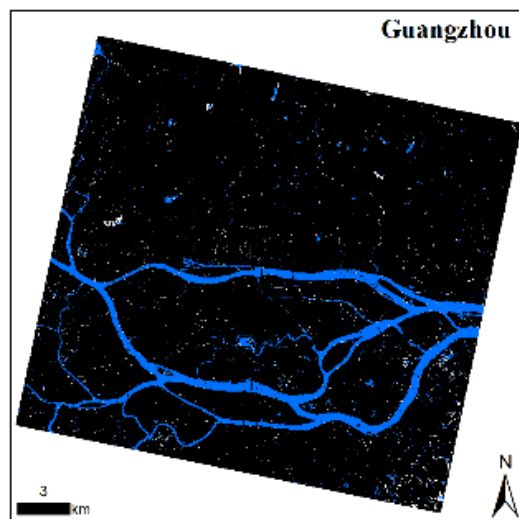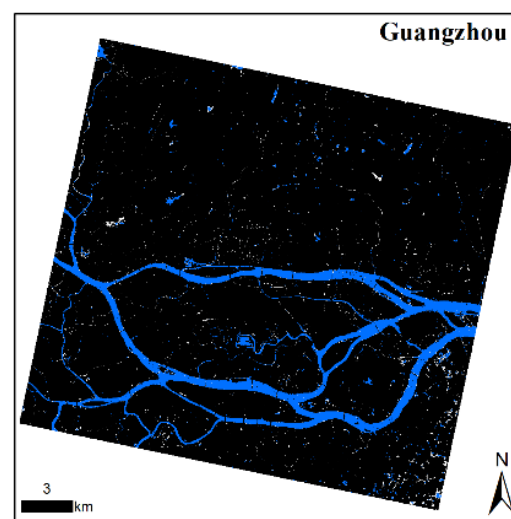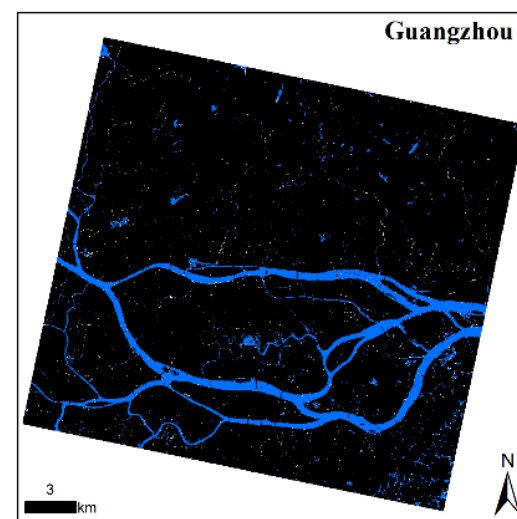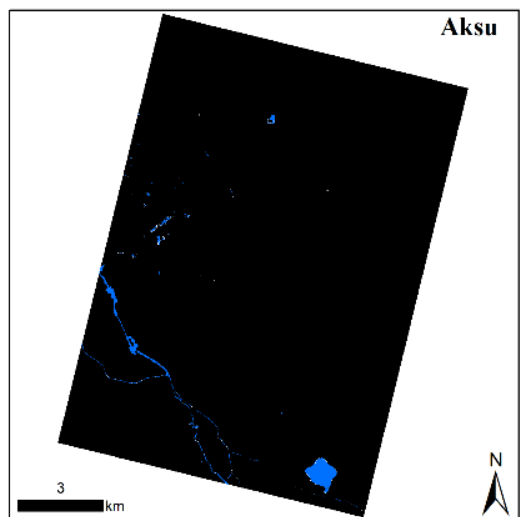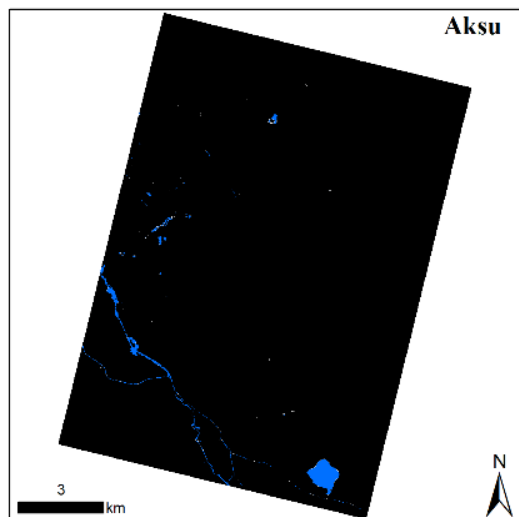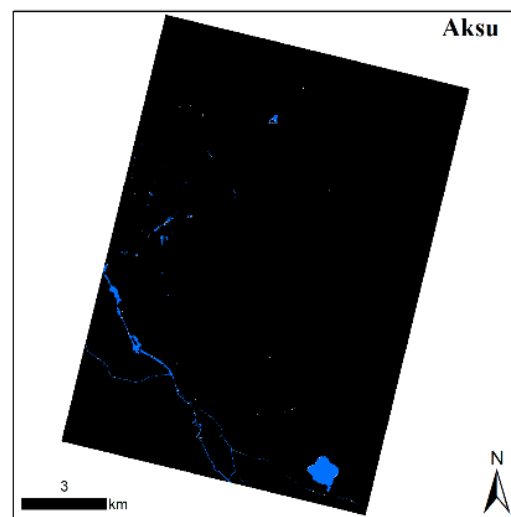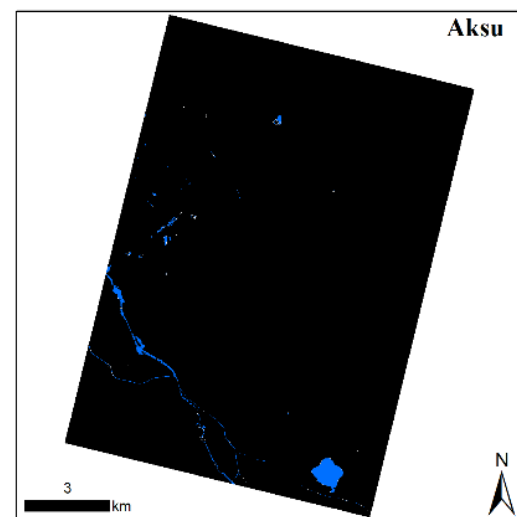

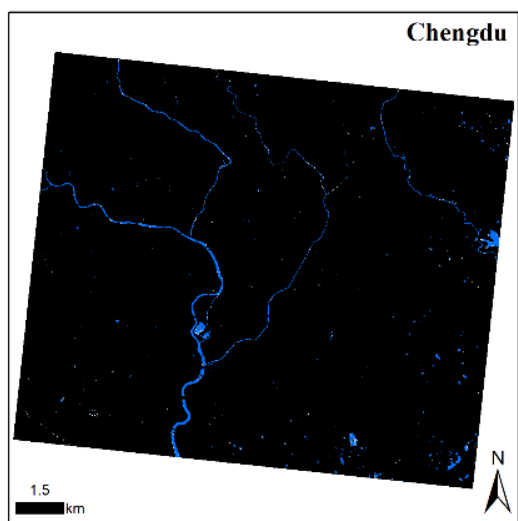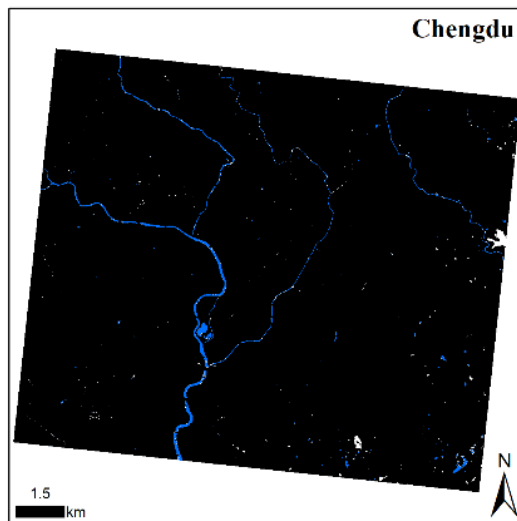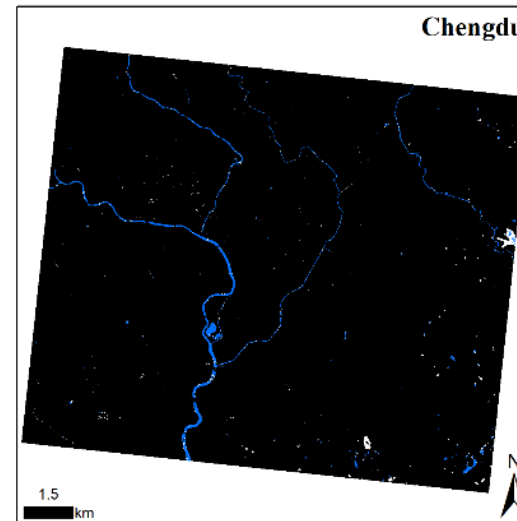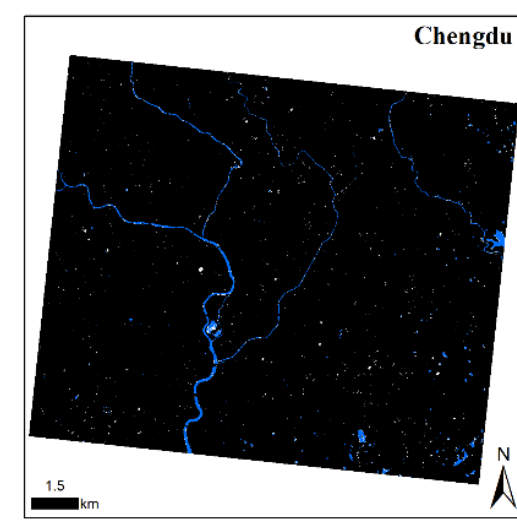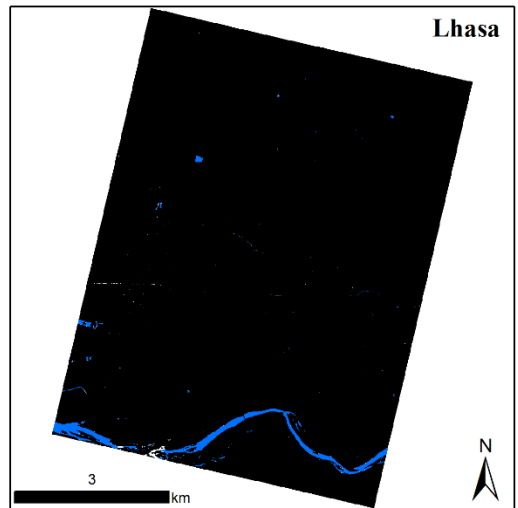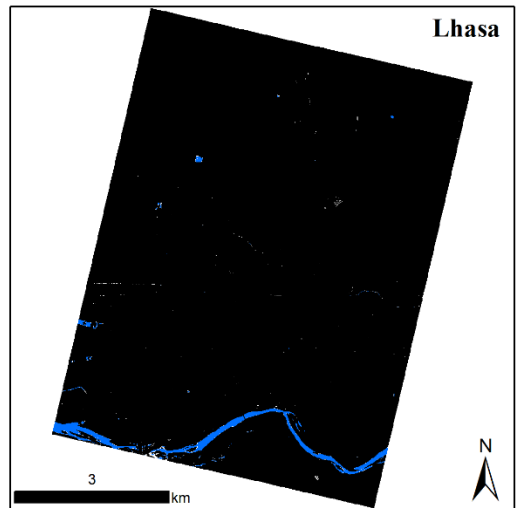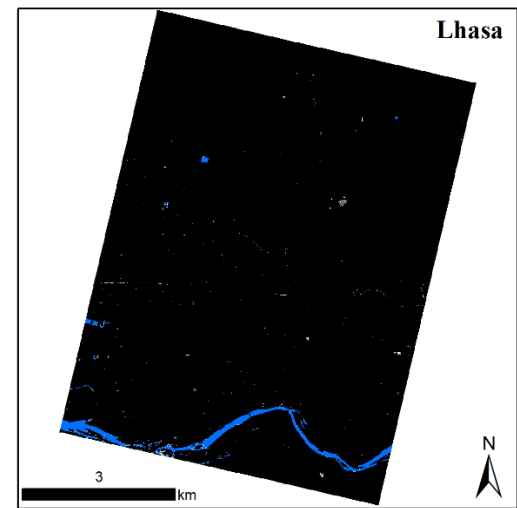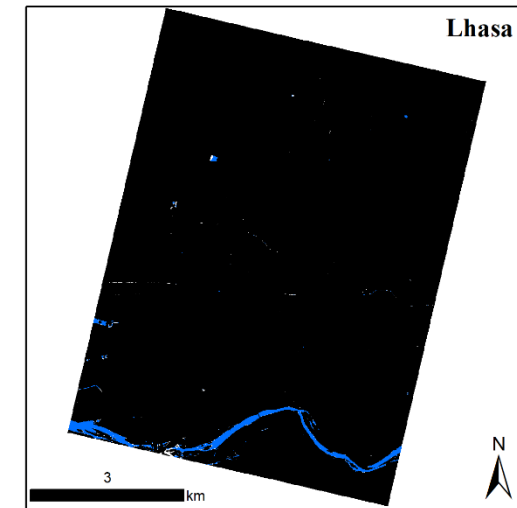

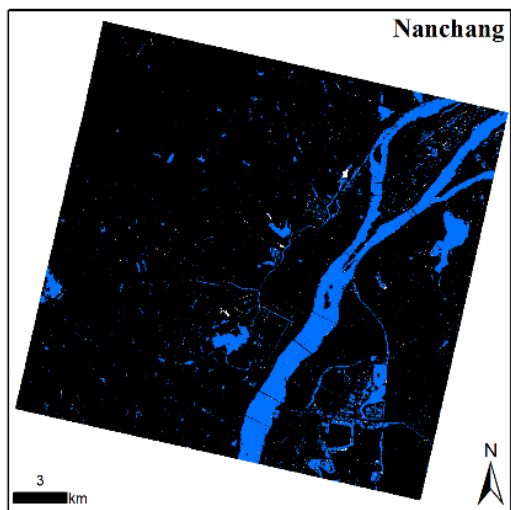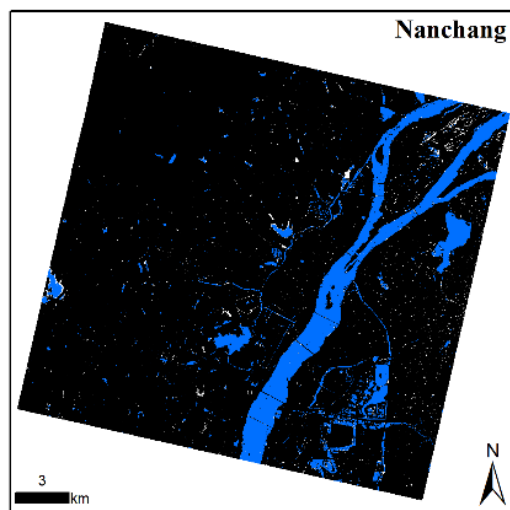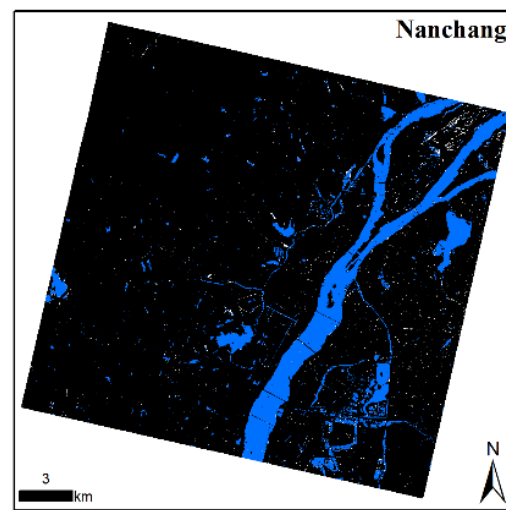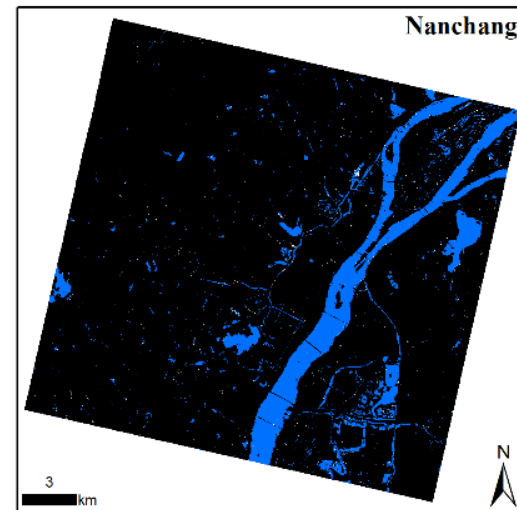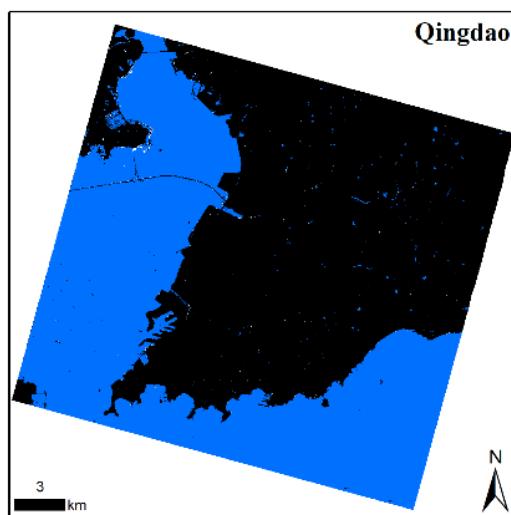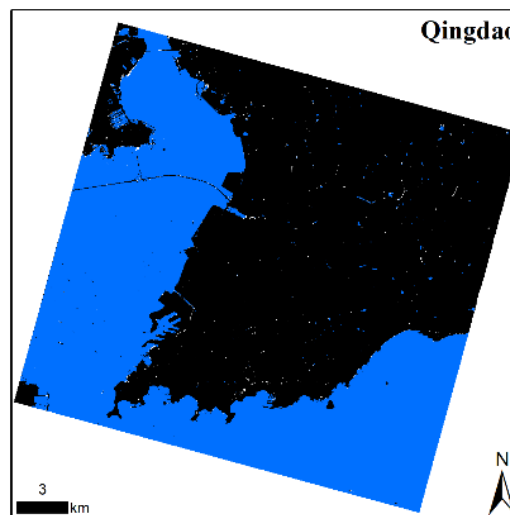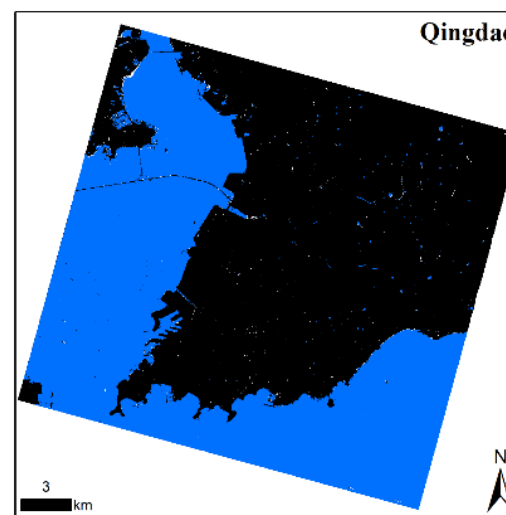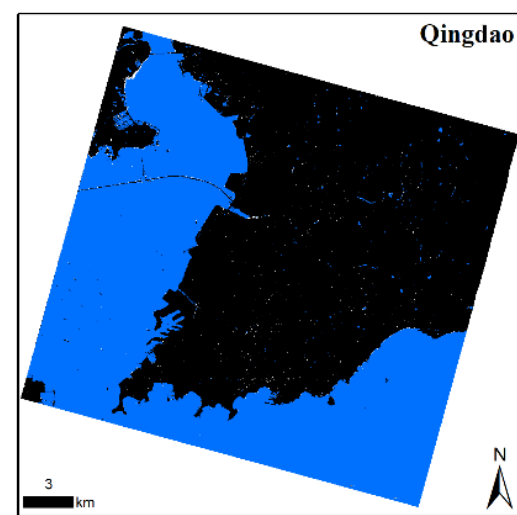

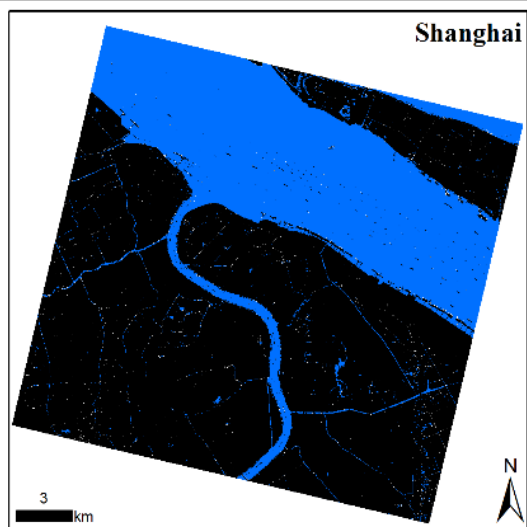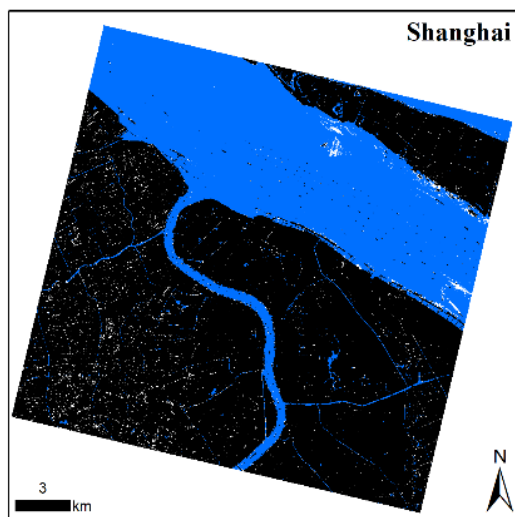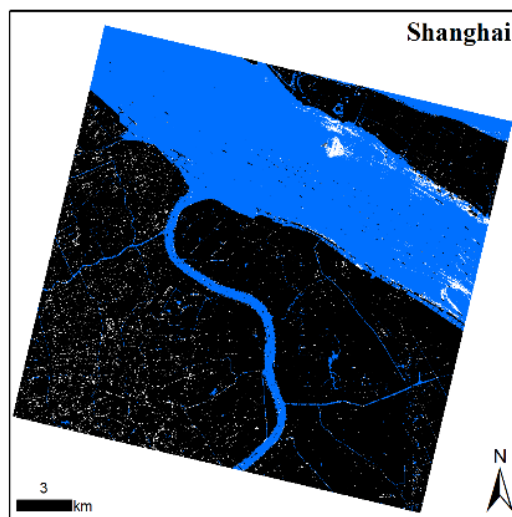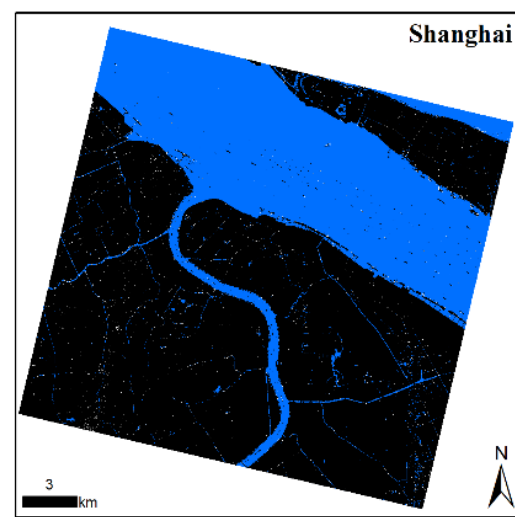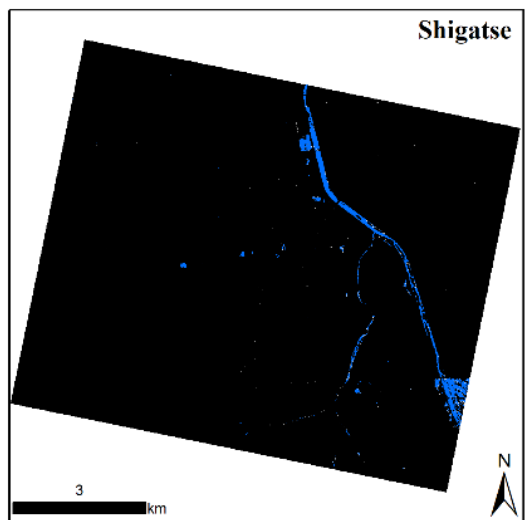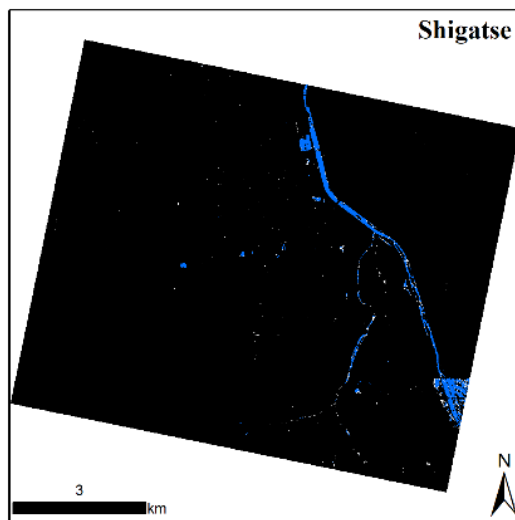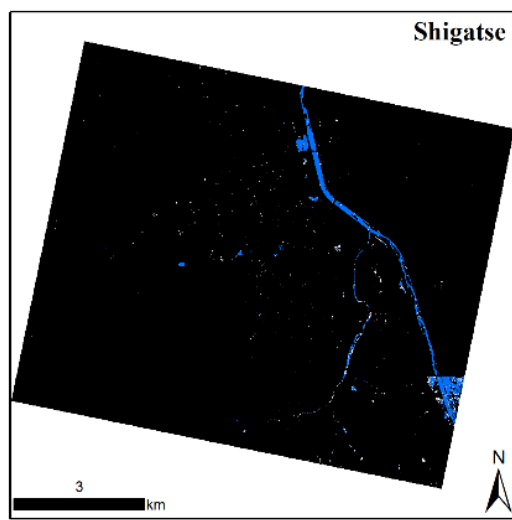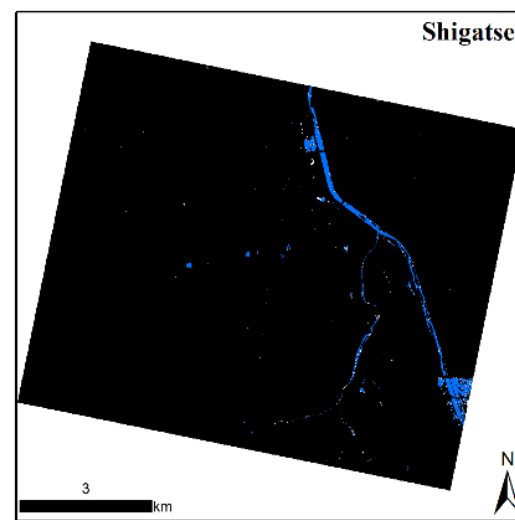

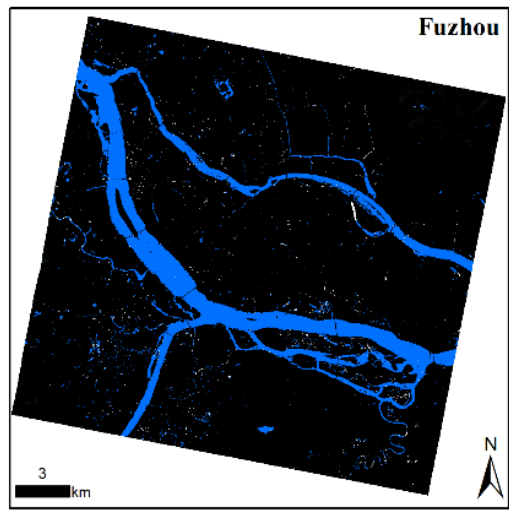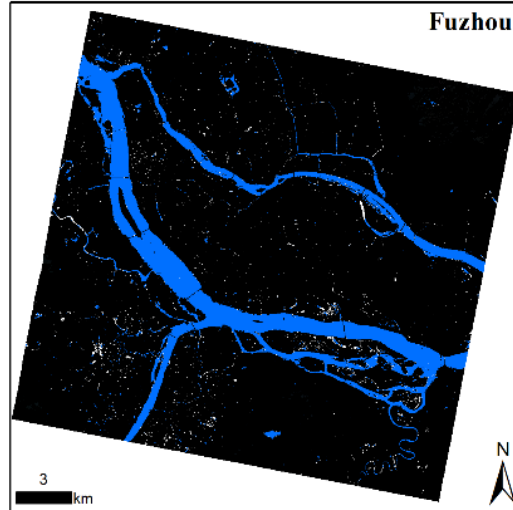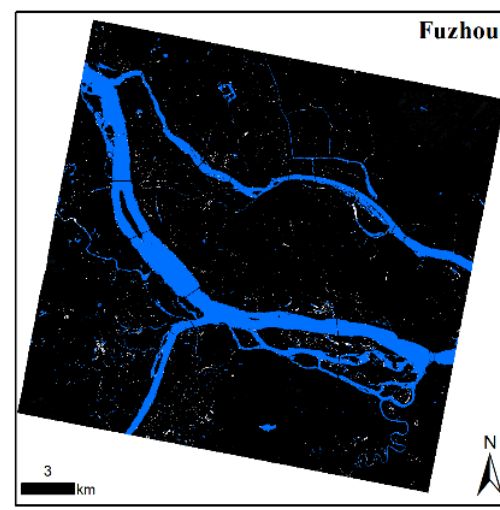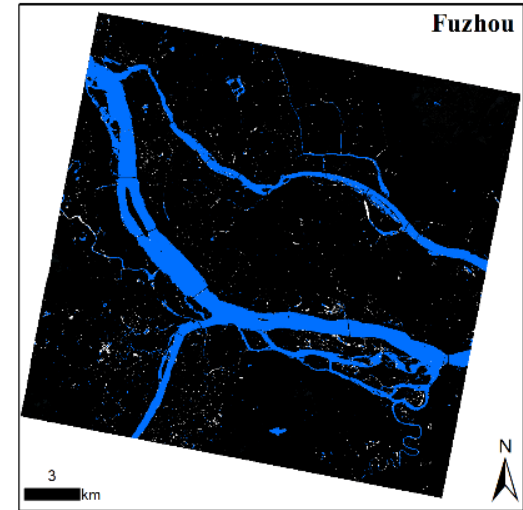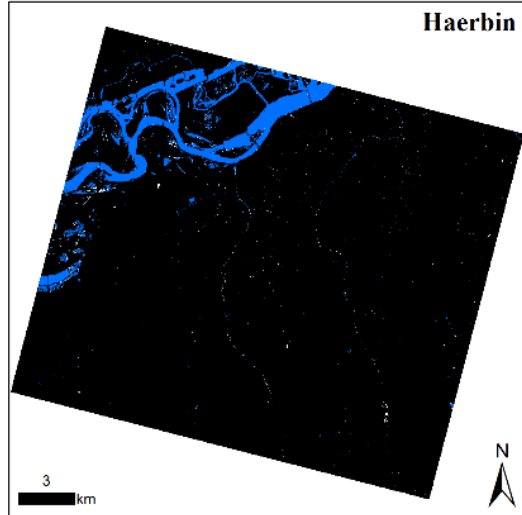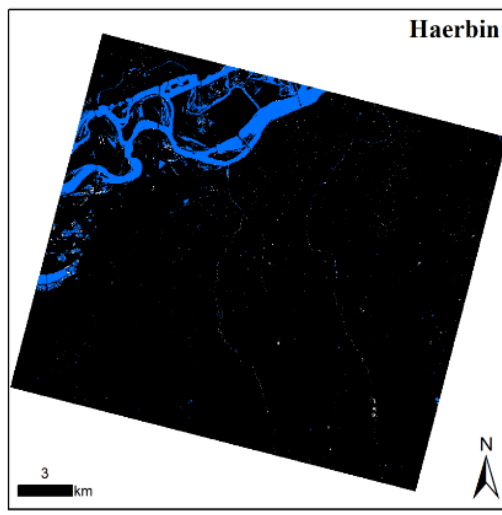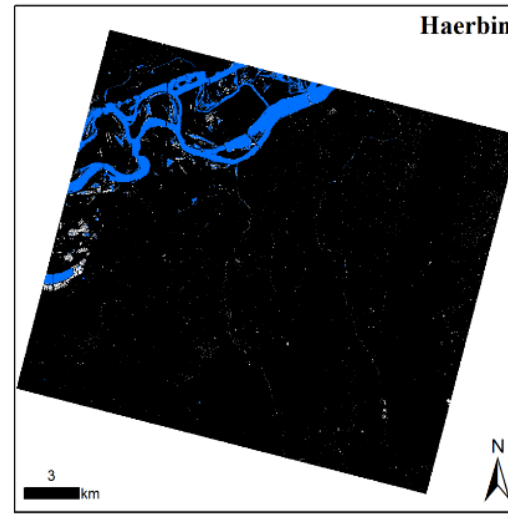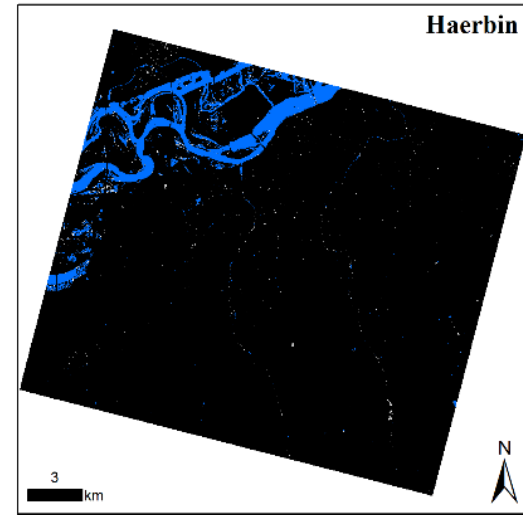

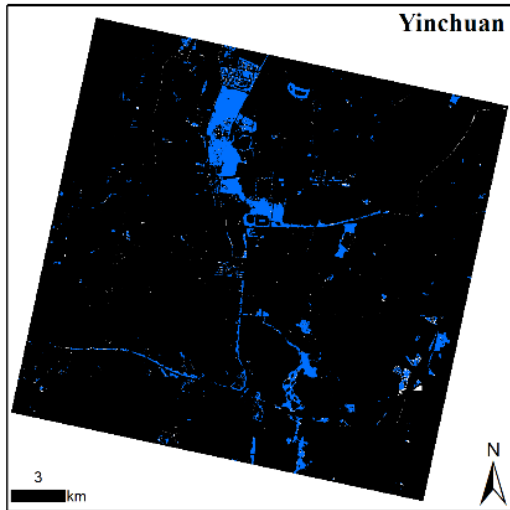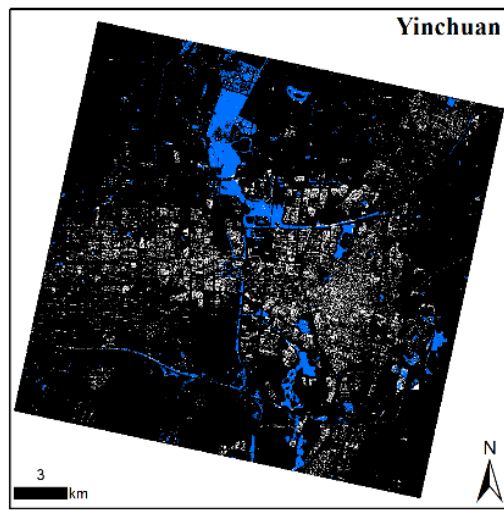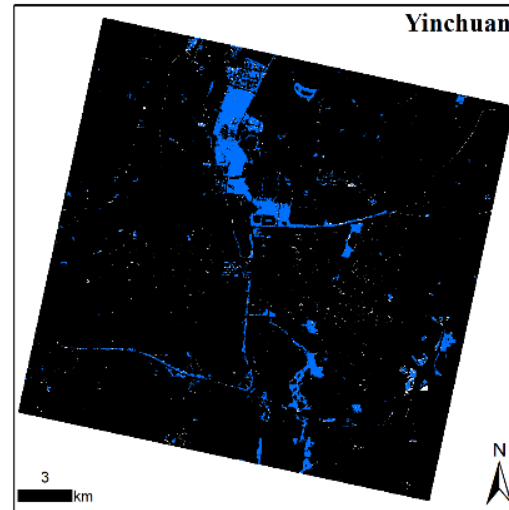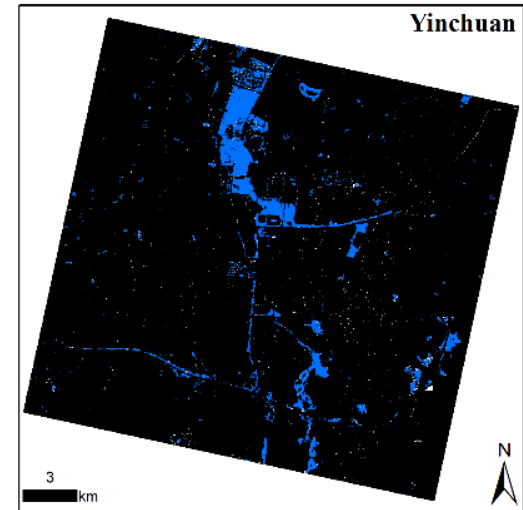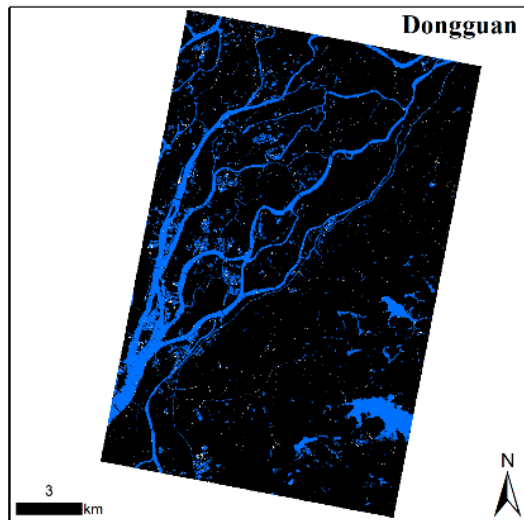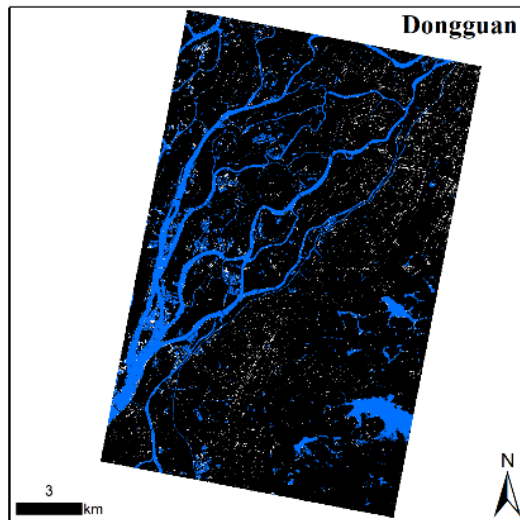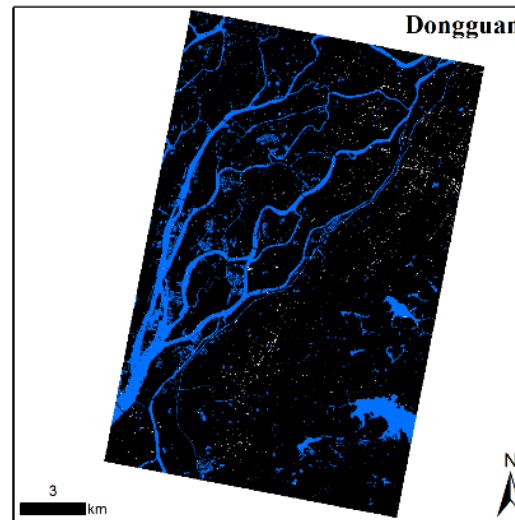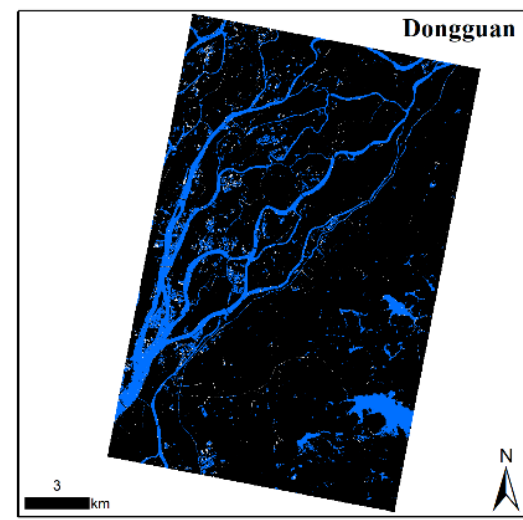



## Legend

-  *Correctly classified as water*
  -  *Misclassified*
  -  *Correctly classified as non-water*
- 

**Figure S1** . Water extraction results using TSUWI, NDWI, HRWI and SVM at the twelve test sites.
